# Supplementary material for: Crystal Structure of African Swine Fever Virus A179L with the Autophagy Regulator Beclin
Source: Preprints.org preprint supplement (doi:10.20944/preprints201908.0095.v1), 2019-08-07
Supplement: Supplementary file 3 [file supplementary]

Archive with 3 entries (2 files):
- Supplementary Figures.pdf
- __MACOSX/
- __MACOSX/._Supplementary Figures.pdf
